# Supplementary material for: Validating the Enright Forgiveness Inventory – 30 (EFI-30)
Source: Atypon-hosted journal article supplement (doi:10.1027/1015-5759/a000649), 2021-07-05
Supplement: 1015-5759_a000649_esm2.pdf [file 1015-5759_a000649_esm2.pdf]

**EFI-30 - Attitude Scale**

We are sometimes hurt by people, whether in family, friendship, school, work or other situations. We ask you to think of the **most recent experience** of someone hurting you **unfairly** and **deeply**. For a few moments, visualize in your mind the events of that interaction. Try to see **the person** and try to experience what happened. Now, please, answer the following questions about that event. (Mark an X in your answer).

How deeply were you hurt when the incident occurred?

- No hurt       A little hurt       Some hurt       Much hurt       A great deal of hurt

Who hurt you?

- Child                               Spouse                               Relative  
 Friend of the same sex       Friend of the opposite sex       Employer  
 Other, please, specify: \_\_\_\_\_ .

Is the person living?  Yes  No

How long ago was the offense?

- Days (less than a week)               Weeks ago (less than a month)  
 Months ago (less than a year)       Years ago

Please, briefly describe the offense:

---

---

---

---

---

---

---

---

Now, please answer a series of questions about your current attitude toward the person. We **do not** want your rating of past attitudes, but your ratings of attitudes **right now**. All responses are confidential so please answer honestly. Thank you!

This set of items deals with your current **feelings** or **emotions** right now toward the person. Try to assess your actual **feeling** for the person on each item. For each item please check the appropriate line that best describes your current feeling. Please, do not skip any item. Thank you!

I feel \_\_\_\_\_ toward him/her. (Think about each word filling this sentence when answering each item).

|              | Strongly<br>Disagree | Disagree | Slightly<br>Disagree | Slightly<br>Agree | Agree | Strongly<br>Agree |
|--------------|----------------------|----------|----------------------|-------------------|-------|-------------------|
| 1. Warm      | 1                    | 2        | 3                    | 4                 | 5     | 6                 |
| 2. Tender    | 1                    | 2        | 3                    | 4                 | 5     | 6                 |
| 3. Unloving  | 1                    | 2        | 3                    | 4                 | 5     | 6                 |
| 4. Repulsed  | 1                    | 2        | 3                    | 4                 | 5     | 6                 |
| 5. Cold      | 1                    | 2        | 3                    | 4                 | 5     | 6                 |
| 6. Dislike   | 1                    | 2        | 3                    | 4                 | 5     | 6                 |
| 7. Caring    | 1                    | 2        | 3                    | 4                 | 5     | 6                 |
| 8. Affection | 1                    | 2        | 3                    | 4                 | 5     | 6                 |
| 9. Friendly  | 1                    | 2        | 3                    | 4                 | 5     | 6                 |
| 10. Disgust  | 1                    | 2        | 3                    | 4                 | 5     | 6                 |

**Please, continue on next page.**

This set of items deals with your **current behavior** toward the person. Consider how you **do act** or **would act** toward the person in answering the questions. For each item please check the appropriate line that **best** describes your current behavior or probable behavior. Please, do not skip any items. Thank you!

Regarding the person, I do or would \_\_\_\_\_. (Think about each word or phrase filling this sentence when answering each item).

|                                              | Strongly<br>Disagree | Disagree | Slightly<br>Disagree | Slightly<br>Agree | Agree | Strongly<br>Agree |
|----------------------------------------------|----------------------|----------|----------------------|-------------------|-------|-------------------|
| 11. Show friendship                          | 1                    | 2        | 3                    | 4                 | 5     | 6                 |
| 12. Avoid                                    | 1                    | 2        | 3                    | 4                 | 5     | 6                 |
| 13. Ignore                                   | 1                    | 2        | 3                    | 4                 | 5     | 6                 |
| 14. Neglect                                  | 1                    | 2        | 3                    | 4                 | 5     | 6                 |
| 15. Not attend to him/her                    | 1                    | 2        | 3                    | 4                 | 5     | 6                 |
| 16. Lend him/her a hand                      | 1                    | 2        | 3                    | 4                 | 5     | 6                 |
| 17. Establish good<br>relations with him/her | 1                    | 2        | 3                    | 4                 | 5     | 6                 |
| 18. Stay away                                | 1                    | 2        | 3                    | 4                 | 5     | 6                 |
| 19. Do a favor                               | 1                    | 2        | 3                    | 4                 | 5     | 6                 |
| 20. Aid him/her when in<br>trouble           | 1                    | 2        | 3                    | 4                 | 5     | 6                 |

**Please, continue on next page.**

This set of items deals with how you **currently think** about the person. Reflect on the kinds of thoughts that occupy your **mind right now** regarding the particular person. For each item please check the appropriate line that **best** describes your current thinking. Please, do not skip any items. Thank you!

I think he or she is \_\_\_\_\_. (Think about each word or phrase filling this sentence when answering each item)

|                     | Strongly<br>Disagree | Disagree | Slightly<br>Disagree | Slightly<br>Agree | Agree | Strongly<br>Agree |
|---------------------|----------------------|----------|----------------------|-------------------|-------|-------------------|
| 21. Horrible        | 1                    | 2        | 3                    | 4                 | 5     | 6                 |
| 22. Of good quality | 1                    | 2        | 3                    | 4                 | 5     | 6                 |
| 23. Dreadful        | 1                    | 2        | 3                    | 4                 | 5     | 6                 |
| 24. Worthless       | 1                    | 2        | 3                    | 4                 | 5     | 6                 |
| 25. A good person   | 1                    | 2        | 3                    | 4                 | 5     | 6                 |
| 26. A bad person    | 1                    | 2        | 3                    | 4                 | 5     | 6                 |

Regarding this person I \_\_\_\_\_. (Think about each word or phrase filling this sentence when answering each item)

|                                   |   |   |   |   |   |   |
|-----------------------------------|---|---|---|---|---|---|
| 27. Wish him/her well             | 1 | 2 | 3 | 4 | 5 | 6 |
| 28. Disapprove of him/her         | 1 | 2 | 3 | 4 | 5 | 6 |
| 29. Think favorably of<br>him/her | 1 | 2 | 3 | 4 | 5 | 6 |
| 30. Hope he/she succeeds          | 1 | 2 | 3 | 4 | 5 | 6 |

**Please, continue on next page.**

In thinking through the person and event you just rated, please consider the following final questions:

|                                                            | Strongly<br>Disagree | Disagree | Slightly<br>Disagree | Slightly<br>Agree | Agree | Strongly<br>Agree |
|------------------------------------------------------------|----------------------|----------|----------------------|-------------------|-------|-------------------|
| 31. There really was no problem now that I think about it. | 1                    | 2        | 3                    | 4                 | 5     | 6                 |
| 32. I was never bothered by what happened.                 | 1                    | 2        | 3                    | 4                 | 5     | 6                 |
| 33. The person was not wrong in what he or she did to me.  | 1                    | 2        | 3                    | 4                 | 5     | 6                 |
| 34. My feelings were never hurt.                           | 1                    | 2        | 3                    | 4                 | 5     | 6                 |
| 35. What the person did was fair.                          | 1                    | 2        | 3                    | 4                 | 5     | 6                 |

We have one final question:

To what extent have you forgiven the person you rated on the **Attitude Scale**? (Mark an X in your answer).

      
(1)  
No et al

      
(2)

      
(3)  
In progress

      
(4)

      
(5)  
Complete  
Forgiveness

**Thank you!**
